# Supplementary material for: Effects of Obesity, Blood Pressure, and Blood Metabolic Biomarkers on Grey Matter Brain Healthcare Quotient: A Large Cohort Study of a Magnetic Resonance Imaging Brain Screening System in Japan
Source: MDPI journal article supplement (doi:10.3390/jcm11112973), 2022-05-25
Supplement: s1 [file s1]

### MRI acquisition parameter

The acquisition parameters were as follows: repetition time, 1800 ms; echo time, 3.7 ms; inversion time, 1100 ms; flip angle, 15° ; field of view, 256mm; voxel size, 1.0 x 1.0 x 1.2 mm for 1.5-T MR system, repetition time, 6 ms; echo time, 2.7 ms; flip angle, 8° ; field of view, 240mm; voxel size, 0.9 x 0.9 x 0.9 mm for 3.0-T MR system.

**Table 2 for younger and older participants than the median**

Table 2 for younger group (under or equal to 64 years old)

|                                      | mean ± standard deviation<br>(range) | partial<br>correlation | <i>p</i> |
|--------------------------------------|--------------------------------------|------------------------|----------|
| <b>blood pressure</b>                |                                      |                        |          |
| systolic blood pressure              | 123.2±15.8 (87 - 190) mmhg           | -0.1                   | 0.011    |
| diastolic blood pressure             | 74.4±11.1 (47 - 128) mmhg            | -0.06                  | 0.107    |
| heart rate                           | 61.8±9.7 (37 - 100) bpm              | -0.1                   | 0.011    |
| <b>obesity measurement</b>           |                                      |                        |          |
| body mass index                      | 23.2±3.4 (15.82 - 48.4)              | -0.25                  | < 0.001* |
| waist circumference                  | 82.5±9.7 (20.7 - 127.6) cm           | -0.22                  | < 0.001* |
| body fat percentage                  | 24.9±6.3 (10.7 - 48.5) %             | -0.2                   | < 0.001* |
| <b>liver function</b>                |                                      |                        |          |
| total protein                        | 7.4±0.4 (6.2 - 8.9) g/dl             | 0.04                   | 0.387    |
| albumin                              | 4.5±0.2 (3.8 - 5.5) g/dl             | 0                      | 0.981    |
| total bilirubin                      | 0.8±0.3 (0.2 - 3.5) mg/dl            | -0.04                  | 0.422    |
| aspartate aminotransferase (AST)     | 23.8±13.8 (9 - 251) U/l              | -0.16                  | 0.002    |
| alanine aminotransferase (ALT)       | 25.3±18.4 (6 - 215) U/l              | -0.16                  | 0.001*   |
| γ-Glutamyl Transpeptidase<br>(γ-GTP) | 47.2±68.9 (7 - 1173) U/l             | -0.18                  | < 0.001* |
| <b>renal function</b>                |                                      |                        |          |
| blood urea nitrogen (BUN)            | 13.8±3.5 (6.5 - 55.1) mg/dl          | 0.09                   | 0.067    |
| creatinine (Cr)                      | 0.8±0.2 (0.36 - 3.24) mg/dl          | 0.07                   | 0.145    |

|                                |                                               |       |          |
|--------------------------------|-----------------------------------------------|-------|----------|
| uric acid                      | 5.4±1.3 (1.8 - 10.2) mg/dl                    | -0.07 | 0.148    |
| <b>lipid metabolism</b>        |                                               |       |          |
| total cholesterol              | 210.9±35.6 (24 - 318) mg/dl                   | 0.01  | 0.881    |
| triglyceride cholesterol       | 113.6±78 (28 - 840) mg/dl                     | -0.05 | 0.155    |
| high density lipoprotein (HDL) | 64.1±16.4 (31 - 152) mg/dl                    | -0.04 | 0.274    |
| low density lipoprotein (LDL)  | 122.3±33.1 (15 - 236) mg/dl                   | 0.02  | 0.652    |
| <b>electrolyte</b>             |                                               |       |          |
| Na                             | 140.8±6.8 (7.2 - 146) mEq/l                   | 0.07  | 0.155    |
| K                              | 4.3±4 (3.2 - 84) mEq/l                        | -0.07 | 0.148    |
| Cl                             | 102.8±2.2 (96 - 111) mEq/l                    | -0.02 | 0.703    |
| Ca                             | 9.4±0.4 (7.6 - 11) mEq/l                      | -0.02 | 0.696    |
| <b>glycometabolism</b>         |                                               |       |          |
| fasting blood glucose (Glu)    | 99.2±15.4 (8 - 249) mg/dl                     | -0.13 | < 0.001* |
| hemoglobin A1c (HbA1c)         | 5.4±0.5 (3.7 - 9.5) %                         | -0.08 | 0.023    |
| <b>blood cell</b>              |                                               |       |          |
| white blood cell (WBC)         | 55.3±14.7 (20.5 - 169.3) x10 <sup>2</sup> /μl | -0.05 | 0.278    |
| red blood cell (RBC)           | 474.6±40.2 (286 - 600) x10 <sup>4</sup> /μl   | -0.02 | 0.627    |
| hemoglobin (Hb)                | 14.7±1.4 (8 - 19) g/dl                        | -0.08 | 0.115    |
| hematocrit (Ht)                | 43.1±3.8 (28.1 - 54.4) %                      | -0.11 | 0.034    |
| platelet (PLT)                 | 23.7±7.1 (5.4 - 168.6) x10 <sup>4</sup> /μl   | 0.01  | 0.907    |
| fibrinogen                     | 276.3±59.6 (140 - 630) mg/dl                  | 0.03  | 0.506    |

\* Statistical significance with Bonferoni correction for multiple comparisons

Table 2 for older group (over 64 years old)

|                         | mean ± standard deviation<br>(range) | partial<br>correlation | <i>p</i> |
|-------------------------|--------------------------------------|------------------------|----------|
| <b>blood pressure</b>   |                                      |                        |          |
| systolic blood pressure | 129.9±17.1 (87 - 206) mmhg           | -0.08                  | 0.075    |

|                                   |                               |       |          |
|-----------------------------------|-------------------------------|-------|----------|
| diastolic blood pressure          | 72.5±10.7 (45 - 123) mmhg     | -0.06 | 0.163    |
| heart rate                        | 64.3±11 (40 - 117) bpm        | -0.06 | 0.161    |
| <b>obesity measurement</b>        |                               |       |          |
| body mass index                   | 22.6±3 (14.22 - 32.61)        | -0.16 | 0.001*   |
| waist circumference               | 83.4±27.4 (25.9 - 860) cm     | -0.03 | 0.460    |
| body fat percentage               | 24.1±6.5 (7 - 47.6) %         | -0.08 | 0.070    |
| <b>liver function</b>             |                               |       |          |
| total protein                     | 7.4±0.4 (6.3 - 10.1) g/dl     | -0.03 | 0.552    |
| albumin                           | 4.4±0.3 (3.4 - 5) g/dl        | 0.01  | 0.854    |
| total bilirubin                   | 0.8±0.3 (0.3 - 2.6) mg/dl     | 0.03  | 0.502    |
| aspartate aminotransferase (AST)  | 25.5±8.7 (14 - 142) U/l       | -0.08 | 0.093    |
| alanine aminotransferase (ALT)    | 21.2±11.5 (3 - 206) U/l       | -0.13 | 0.003    |
| γ-Glutamyl Transpeptidase (γ-GTP) | 34.9±39 (8 - 681) U/l         | -0.18 | < 0.001* |
| <b>renal function</b>             |                               |       |          |
| blood urea nitrogen (BUN)         | 16.3±4 (5.6 - 36.7) mg/dl     | 0.01  | 0.77     |
| creatinine (Cr)                   | 0.8±0.3 (0.37 - 8.66) mg/dl   | 0.00  | 0.998    |
| uric acid                         | 5.3±1.3 (0.7 - 11.1) mg/dl    | -0.03 | 0.501    |
| <b>lipid metabolism</b>           |                               |       |          |
| total cholesterol                 | 211.1±67.9 (105 - 2013) mg/dl | 0.08  | 0.041    |
| triglyceride cholesterol          | 106.2±60.5 (29 - 924) mg/dl   | -0.07 | 0.046    |
| high density lipoprotein (HDL)    | 64.8±16.5 (30 - 155) mg/dl    | 0.01  | 0.812    |
| low density lipoprotein (LDL)     | 117.8±27.1 (40 - 232) mg/dl   | 0.07  | 0.065    |
| <b>electrolyte</b>                |                               |       |          |
| Na                                | 141.1±1.9 (131 - 146) mEq/l   | -0.03 | 0.583    |
| K                                 | 4.1±0.3 (2.6 - 5.3) mEq/l     | -0.01 | 0.846    |
| Cl                                | 102.5±5 (5.7 - 111) mEq/l     | 0.03  | 0.557    |

|                             |                                               |       |       |
|-----------------------------|-----------------------------------------------|-------|-------|
| Ca                          | 9.5±3.7 (8.5 - 93) mEq/l                      | -0.01 | 0.888 |
| <b>glycometabolism</b>      |                                               |       |       |
| fasting blood glucose (Glu) | 105.1±22.1 (0 - 334) mg/dl                    | -0.10 | 0.005 |
| hemoglobin A1c (HbA1c)      | 5.7±0.7 (4.5 - 10.9) %                        | -0.10 | 0.006 |
| <b>blood cell</b>           |                                               |       |       |
| white blood cell (WBC)      | 61.9±231.3 (18.4 - 7010) x10 <sup>2</sup> /μl | 0.00  | 0.925 |
| red blood cell (RBC)        | 446.7±43 (241 - 596) x10 <sup>4</sup> /μl     | -0,04 | 0.373 |
| hemog]obin (Hb)             | 14±1.4 (7.7 - 18.8) g/dl                      | -0,08 | 0.072 |
| hematocrit (Ht)             | 41.4±3.6 (23.6 - 54.6) %                      | -0.09 | 0.038 |
| platelet (PLT)              | 21.5±4.7 (7 - 42.3) x10 <sup>4</sup> /μl      | 0.00  | 0.944 |
| fibrinogen                  | 308.5±65.4 (156 - 571) mg/dl                  | 0.08  | 0.087 |

\* Statistical significance with Bonferoni correction for multiple comparisons

**Table 3 for younger and older participants than the median**

Table 3 for younger group (under or equal to 64 years old)

|                                   | <i>b</i> | Standard error | Standardization<br>coefficient | <i>t</i> | <i>p</i> |
|-----------------------------------|----------|----------------|--------------------------------|----------|----------|
| systolic blood pressure           | -0.01    | 0.01           | -0.02                          | -0.69    | 0.49     |
| Body mass index                   | -0.28    | 0.07           | -0.11                          | -3.97    | < 0.001* |
| γ-Glutamyl Transpeptidase (γ-GTP) | 0.00     | 0.00           | -0.04                          | -1.72    | 0.09     |
| uric acid                         | 0.24     | 0.19           | 0.04                           | 1.30     | 0.19     |
| fasting blood glucose             | -0.02    | 0.01           | -0.03                          | -1.12    | 0.26     |
| hematocrit                        | -0.04    | 0.07           | -0.02                          | -0.60    | 0.55     |

Table 3 for older group (over 64 years old)

|                                   | <i>b</i> | Standard error | Standardization<br>coefficient | <i>t</i> | <i>p</i> |
|-----------------------------------|----------|----------------|--------------------------------|----------|----------|
| systolic blood pressure           | -0.01    | -0.02          | -0.02                          | -0.42    | 0.678    |
| Body mass index                   | -0.32    | 0.01           | -0.12                          | -3.22    | 0.001*   |
| γ-Glutamyl Transpeptidase (γ-GTP) | -0.03    | 0.01           | -0.11                          | -2.95    | 0.003*   |
| uric acid                         | -0.43    | 0.25           | -0.07                          | -1.73    | 0.084    |
| fasting blood glucose             | -0.02    | 0.01           | -0.05                          | -1.48    | 0.139    |
| hematocrit                        | -0.04    | 0.09           | -0.02                          | -0.41    | 0.681    |
